# Supplementary material
Source: HighWire-hosted journal article supplement (https://www.ajnr.org/highwire/filestream/97060/field_highwire_adjunct_files/0/1063.pdf)
Supplement: 1063.pdf [file 1063.pdf]

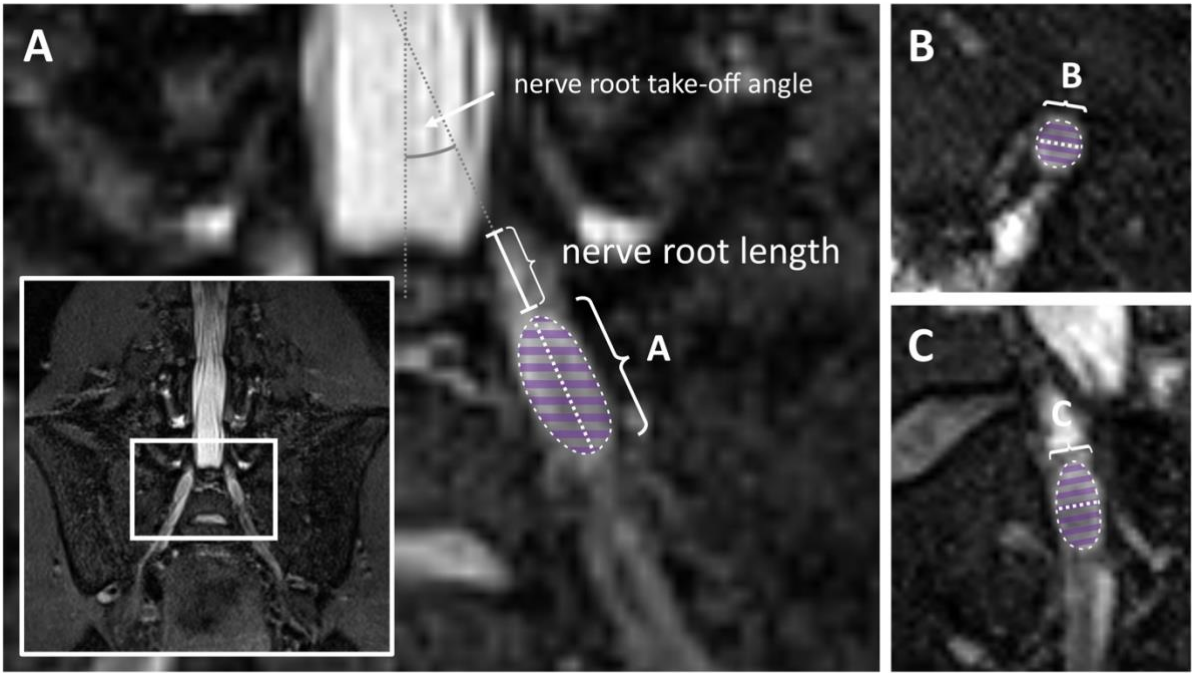

**Online Figure 1** Visualization of the acquisition of the three principal geometric axes **A** in coronal, **B** in axial and **C** in sagittal reformations; **A** Visualization of the acquisition of take-off angle and length of nerve root.

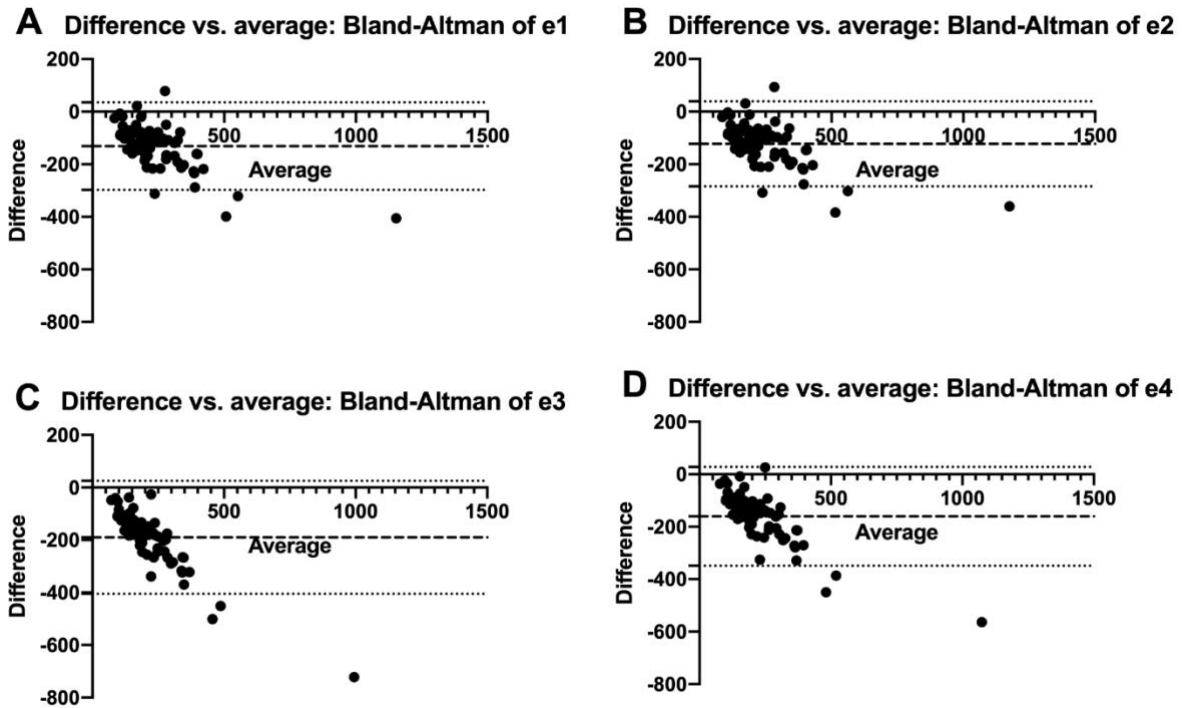

**Online Figure 2** Bland-Altman plots of **A**  $DRG_{vol}(e1)$  vs.  $DRG_{vol}(r)$ , **B**  $DRG_{vol}(e2)$  vs.  $DRG_{vol}(r)$ , **C**  $DRG_{vol}(e3)$  vs.  $DRG_{vol}(r)$ , **D**  $DRG_{vol}(e4)$  vs.  $DRG_{vol}(r)$ ; the x-value shows the mean of the two volumes and the y-value shows the difference between the volumes; the dashed horizontal line shows the bias of the paired difference; the dotted horizontal lines show limits of agreement from  $-1.96 \times$  standard deviation to  $+1.96 \times$  standard deviation. Abbreviations:  $DRG_{vol}$  = dorsal-root-ganglion volume;  $DRG_{vol}(r)$  = real dorsal-root-ganglion volume, determined by mean of voxel-wise segmentation by three raters; e1/e2/e3/e4 = equation 1/2/3/4;  $DRG_{vol}(e1/e2/e3/e4)$  = estimated dorsal-root-ganglion volume by equation e1/e2/e3/e4/

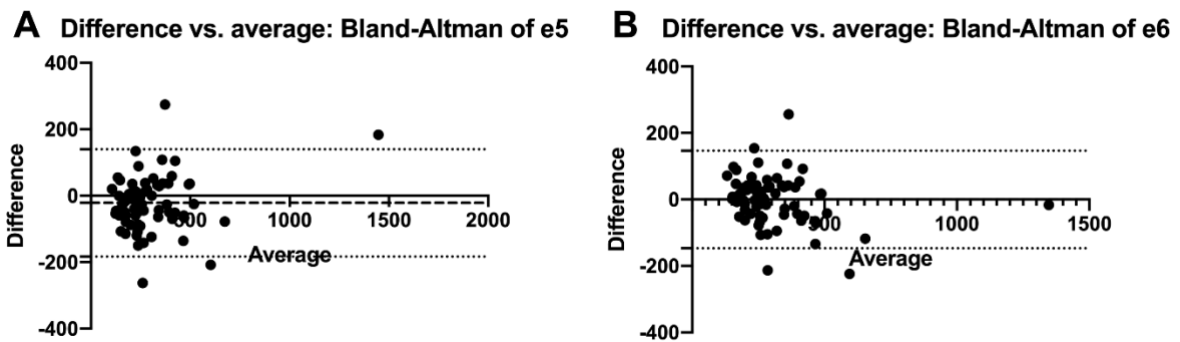

**Online Figure 3** Bland-Altman plots of **A**  $DRG_{vol}$  (e5) vs.  $DRG_{vol}$  (r), **B**  $DRG_{vol}$  (e6) vs.  $DRG_{vol}$  (r); the x-value shows the mean of the two volumes and the y-value shows the difference between the two volumes; the dashed horizontal line shows the bias of the paired difference; the dotted horizontal lines show limits of agreement from  $-1.96 \times$  standard deviation to  $+1.96 \times$  standard deviation. Abbreviations:  $DRG_{vol}$  = dorsal-root-ganglion volume;  $DRG_{vol}$  (r) = real dorsal-root-ganglion volume, determined by mean of voxel-wise segmentation by three raters; e5/e6 = equation 5/6;  $DRG_{vol}$  (e5/e6) = estimated dorsal-root-ganglion volume by equation e5/e6

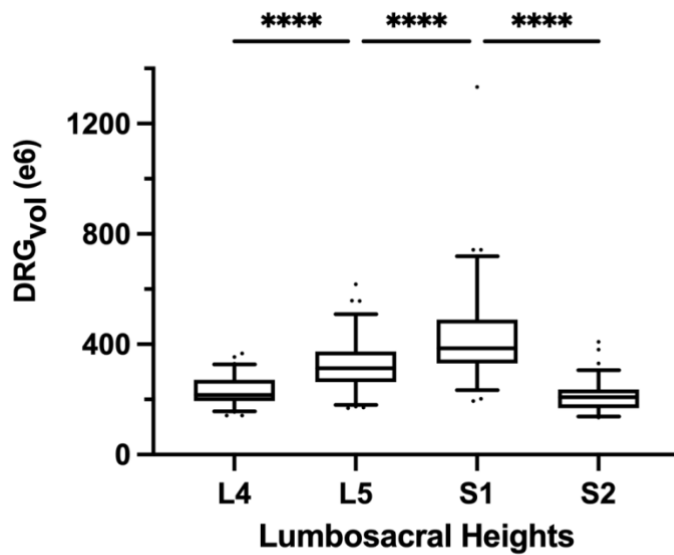

**Online Figure 4** Boxplot of DRG<sub>vol</sub> (e6) showing the DRG<sub>vol</sub> [mm<sup>3</sup>] for the different lumbar sacral heights L4 – S2 of men (n=294). The top of the box represents the 75<sup>th</sup> percentile, the bottom of the box represents the 25<sup>th</sup> percentile. The line in the middle represents the 50<sup>th</sup> percentile (median). The whiskers represent the 5<sup>th</sup> and 95<sup>th</sup> percentiles, and values beyond lower and upper bounds represent outliers and extreme values. Significances are marked with asterisks (indicating p < .001). Abbreviations: DRG<sub>vol</sub> (e6) = estimated dorsal-root-ganglion volume by equation e6; L4 = 4<sup>th</sup> lumbar level; L5 = 5<sup>th</sup> lumbar level; S1 = 1<sup>st</sup> sacral level; S2 = 2<sup>nd</sup> sacral level

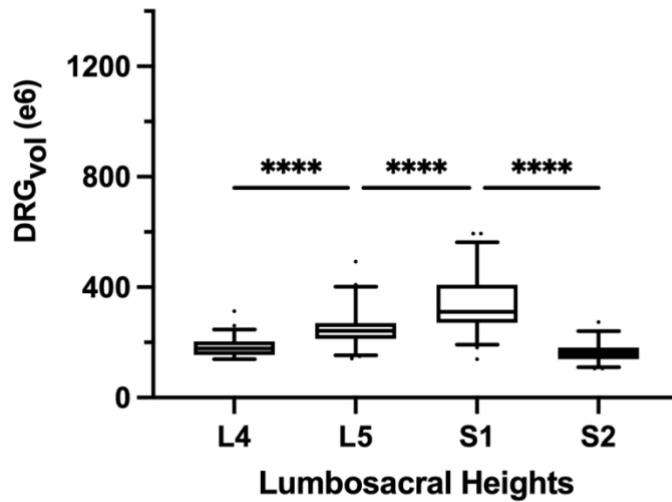

**Online Figure 5** Boxplot of DRG<sub>vol</sub> (e6) showing the DRG<sub>vol</sub> [mm<sup>3</sup>] for the different lumbosacral heights L4 – S2 of women (n=216). The top of the box represents the 75<sup>th</sup> percentile, the bottom of the box represents the 25<sup>th</sup> percentile. The line in the middle represents the 50<sup>th</sup> percentile (median). The whiskers represent the 5<sup>th</sup> and 95<sup>th</sup> percentiles, and values beyond lower and upper bounds represent outliers and extreme values. Significances are marked with asterisks (indicating p < .001). Abbreviations: DRG<sub>vol</sub> (e6) = estimated dorsal-root-ganglion volume by equation e6; L4 = 4<sup>th</sup> lumbar level; L5 = 5<sup>th</sup> lumbar level; S1 = 1<sup>st</sup> sacral level; S2 = 2<sup>nd</sup> sacral level

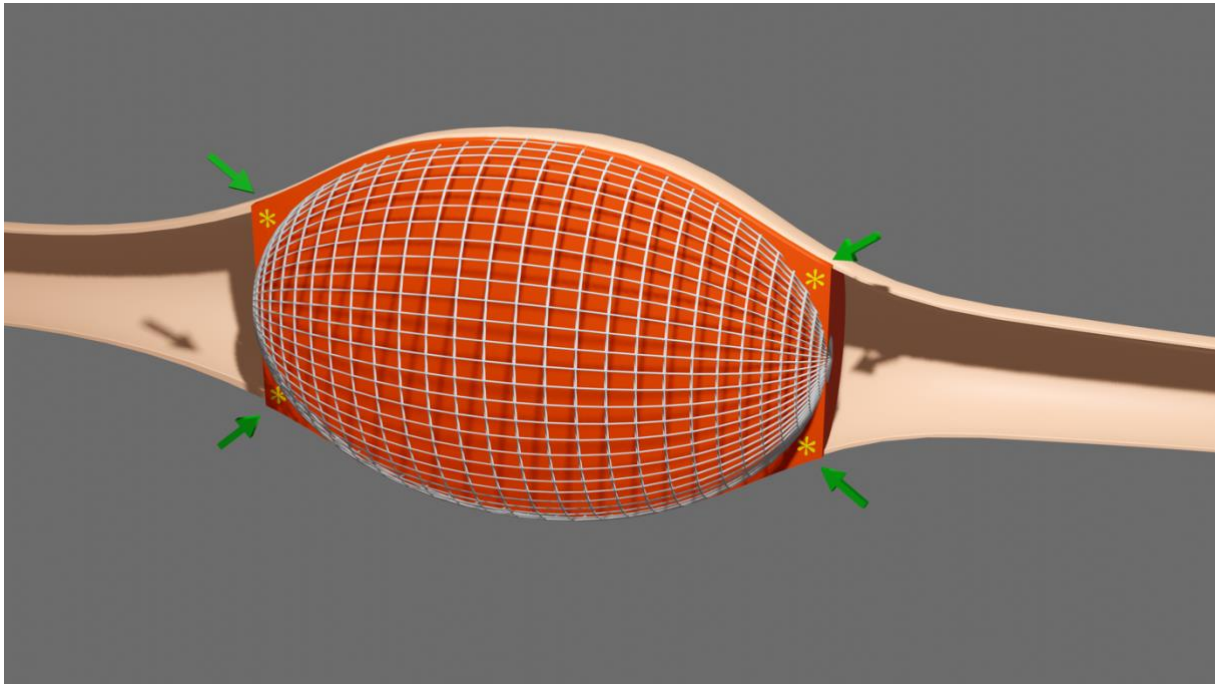

**Online Figure 6** 3D rendered visualization of the DRG as geometrical body that is connected to the adjacent nerve segments. An ellipsoidal 3D object was projected onto the sectional surface of an idealized DRG (gray mesh surface). This ellipsoid tapers at its medial and lateral end. However, real DRG morphology at these ends merges with the adjacent nerve segments over a broader volume area (triangular volume regions not incorporated into ellipsoid object, marked by asterisks and arrows). Neglecting this triangular region by simply applying ellipsoid geometry without offset correction would underestimate true DRG volume.

**Online Table 1**

*Overview of the length of principal geometric axes and volumes of 96 dorsal root ganglia for ground truth derivation*

| Parameter                                          | all DRG  |          |           |                | L4       |          |           |                | L5       |          |           |                | S1       |          |           |                | S2       |          |           |                |
|----------------------------------------------------|----------|----------|-----------|----------------|----------|----------|-----------|----------------|----------|----------|-----------|----------------|----------|----------|-----------|----------------|----------|----------|-----------|----------------|
|                                                    | <i>n</i> | <i>M</i> | <i>SD</i> | 95% <i>CI</i>  | <i>n</i> | <i>M</i> | <i>SD</i> | 95% <i>CI</i>  | <i>n</i> | <i>M</i> | <i>SD</i> | 95% <i>CI</i>  | <i>n</i> | <i>M</i> | <i>SD</i> | 95% <i>CI</i>  | <i>n</i> | <i>M</i> | <i>SD</i> | 95% <i>CI</i>  |
| DRG <sub>vol</sub> ( <i>r</i> ) [mm <sup>3</sup> ] | 96       | 280.     | 165.      | [246.6, 313.6] | 24       | 202.     | 64.1      | [175.2, 229.3] | 24       | 299.     | 91.9      | [260.9, 338.6] | 24       | 421.     | 243.      | [318.2, 523.8] | 24       | 197.     | 80.7      | [163.1, 231.3] |
| L female                                           | 56       | 221.     | 88.8      | [197.8, 245.3] | 14       | 160.     | 35.0      | [139.8, 180.2] | 14       | 255.     | 63.7      | [218.3, 291.8] | 14       | 307.     | 92.4      | [254.3, 361.0] | 14       | 163.     | 51.5      | [133.7, 193.0] |
| L male                                             | 40       | 362.     | 209.      | [295.1, 428.9] | 10       | 261.     | 45.3      | [229.1, 293.9] | 10       | 362.     | 91.1      | [297.1, 427.4] | 10       | 579.     | 301.      | [363.7, 795.7] | 10       | 244.     | 92.7      | [178.2, 310.8] |
| A [mm]                                             | 96       | 9.8      | 2.8       | [9.2, 10.4]    | 24       | 7.8      | 1.5       | [7.2, 8.5]     | 24       | 10.4     | 2.6       | [9.3, 11.5]    | 24       | 12.5     | 2.6       | [11.5, 13.6]   | 24       | 8.3      | 1.8       | [7.6, 9.1]     |
| B [mm]                                             | 96       | 5.3      | 1.1       | [5.1, 5.5]     | 24       | 5.3      | 1.0       | [4.8, 5.7]     | 24       | 5.5      | 0.9       | [5.2, 5.9]     | 24       | 5.8      | 1.3       | [5.3, 6.3]     | 24       | 4.5      | 0.8       | [4.2, 4.9]     |
| C [mm]                                             | 96       | 5.5      | 1.3       | [5.2, 5.7]     | 24       | 5.0      | 0.8       | [4.6, 5.3]     | 24       | 6.1      | 0.7       | [5.8, 6.4]     | 24       | 6.4      | 1.3       | [5.9, 7.0]     | 24       | 4.5      | 1.1       | [4.0, 4.9]     |
| DRG <sub>vol</sub> (e1) [mm <sup>3</sup> ]         | 96       | 161.     | 118.      | [137.9, 185.7] | 24       | 107.     | 39.4      | [91.1, 124.3]  | 24       | 184.     | 60.5      | [158.7, 209.8] | 24       | 262.     | 176.      | [188.3, 337.6] | 24       | 92.4     | 43.2      | [74.2, 110.6]  |
| DRG <sub>vol</sub> (e2) [mm <sup>3</sup> ]         | 96       | 154.     | 112.      | [131.7, 177.4] | 24       | 102.     | 37.6      | [87.0, 118.7]  | 24       | 175.     | 57.7      | [151.5, 200.3] | 24       | 251.     | 168.      | [179.8, 322.4] | 24       | 88.2     | 41.2      | [70.8, 105.6]  |
| DRG <sub>vol</sub> (e3) [mm <sup>3</sup> ]         | 96       | 103.     | 75.2      | [87.8, 118.2]  | 24       | 68.6     | 25.1      | [58.0, 79.1]   | 24       | 117.     | 38.5      | [101.0, 133.5] | 24       | 167.     | 112.      | [119.9, 214.9] | 24       | 58.8     | 27.5      | [47.2, 70.4]   |
| DRG <sub>vol</sub> (e4) [mm <sup>3</sup> ]         | 96       | 128.     | 94.0      | [109.7, 147.8] | 24       | 85.7     | 31.3      | [72.5, 98.9]   | 24       | 146.     | 48.1      | [126.3, 166.9] | 24       | 209.     | 140.      | [149.8, 268.6] | 24       | 73.5     | 34.3      | [59.0, 88.0]   |
| DRG <sub>vol</sub> (e5) [mm <sup>3</sup> ]         | 96       | 253.     | 184.      | [215.9, 290.9] | 24       | 168.     | 61.6      | [142.6, 194.7] | 24       | 288.     | 94.7      | [248.5, 328.5] | 24       | 411.     | 276.      | [294.9, 528.7] | 24       | 144.     | 67.6      | [166.2, 173.2] |
| DRG <sub>vol</sub> (e6) [mm <sup>3</sup> ]         | 96       | 281.     | 150.      | [250.6, 311.5] | 24       | 212.     | 50.1      | [191.0, 233.3] | 24       | 309.     | 77.0      | [277.0, 342.1] | 24       | 409.     | 225.      | [314.8, 504.8] | 24       | 192.     | 54.9      | [169.4, 215.8] |

*Note. DRG<sub>vol</sub> (*r*) = real dorsal root ganglion volume, A = length of dorsal root ganglion, B = width of dorsal root ganglion, C = depth of dorsal root ganglion, DRG<sub>vol</sub> (e1) - DRG<sub>vol</sub> (e6) = estimated dorsal root ganglion volume by equation e(1) - equation e(6) respectively. *n* = number of elements, *M* = mean, *SD* = standard deviation, 95% *CI* = 95% confidence interval.*

## Online Table 2

Overview of the length of principal geometric axes and volumes of the 510 dorsal root ganglia and overview of the take off angle and length of the corresponding nerve roots

| Parameter                                  | L4       |          |           |                | L5       |          |           |                | S1       |          |           |                | S2       |          |           |                |
|--------------------------------------------|----------|----------|-----------|----------------|----------|----------|-----------|----------------|----------|----------|-----------|----------------|----------|----------|-----------|----------------|
|                                            | <i>n</i> | <i>M</i> | <i>SD</i> | 95% <i>CI</i>  | <i>n</i> | <i>M</i> | <i>SD</i> | 95% <i>CI</i>  | <i>n</i> | <i>M</i> | <i>SD</i> | 95% <i>CI</i>  | <i>n</i> | <i>M</i> | <i>SD</i> | 95% <i>CI</i>  |
| A [mm]                                     | 128      | 7.4      | 1.4       | [7.1, 7.6]     | 128      | 9.2      | 2.1       | [8.8, 9.6]     | 128      | 12.2     | 2.2       | [11.9, 12.6]   | 126      | 8.5      | 1.6       | [8.2, 8.7]     |
| B [mm]                                     | 128      | 5.5      | 0.9       | [5.3, 5.6]     | 128      | 5.5      | 0.9       | [5.4, 5.7]     | 128      | 5.7      | 1.0       | [5.5, 5.8]     | 126      | 4.4      | 0.9       | [4.3, 4.6]     |
| C [mm]                                     | 128      | 5.0      | 0.9       | [4.8, 5.2]     | 128      | 6.2      | 1.1       | [6.0, 6.4]     | 128      | 6.4      | 1.1       | [6.2, 6.6]     | 126      | 4.5      | 0.9       | [4.4, 4.7]     |
| DRG <sub>vol</sub> (e6) [mm <sup>3</sup> ] | 128      | 211.3    | 52.5      | [202.2, 220.5] | 128      | 290.7    | 90.9      | [274.8, 306.6] | 128      | 384.2    | 145.0     | [358.8, 409.5] | 126      | 192.4    | 52.6      | [183.1, 201.7] |
| NR length [mm]                             | 128      | 9.2      | 2.1       | [8.8, 9.5]     | 128      | 13.0     | 2.9       | [12.5, 13.6]   | 128      | 14.6     | 4.0       | [13.9, 15.3]   | 126      | 16.5     | 4.4       | [15.7, 17.2]   |
| NR angle [°]                               | 128      | 37.9     | 9.0       | [36.4, 39.5]   | 128      | 35.5     | 8.0       | [33.9, 36.7]   | 128      | 22.8     | 6.4       | [21.7, 23.9]   | 126      | 17.4     | 5.0       | [16.5, 18.3]   |

Note. DRG<sub>vol</sub> (e6) = dorsal root ganglion volume estimated by equation e(6), A = length of dorsal root ganglion, B = width of dorsal root ganglion, C = depth of dorsal root ganglion, NR angle = nerve root take off angle in coronal plane, NR length = length of nerve root. *n* = number of elements, *M* = mean, *SD* = standard deviation, 95% *CI* = 95% confidence interval.
